# Supplementary material for: Updates of the In‐Gel Digestion Method for Protein Analysis by Mass Spectrometry
Source: PubMed Central journal article supplement (PMC6492177; doi:10.1002/pmic.201800236), 2018-11-25
Supplement: PMIC-18-na-s003.pdf [file PMIC-18-na-s003.pdf]

# PROTEOMICS

**Supporting Information**

**for Proteomics**

**DOI 10.1002/pmic.201800236**

Jennifer K. Goodman, Cleidiane G. Zampronio, Alexandra M. E. Jones  
and Juan R. Hernandez-Fernaud

**Updates of the In-Gel Digestion Method for Protein Analysis by Mass  
Spectrometry**

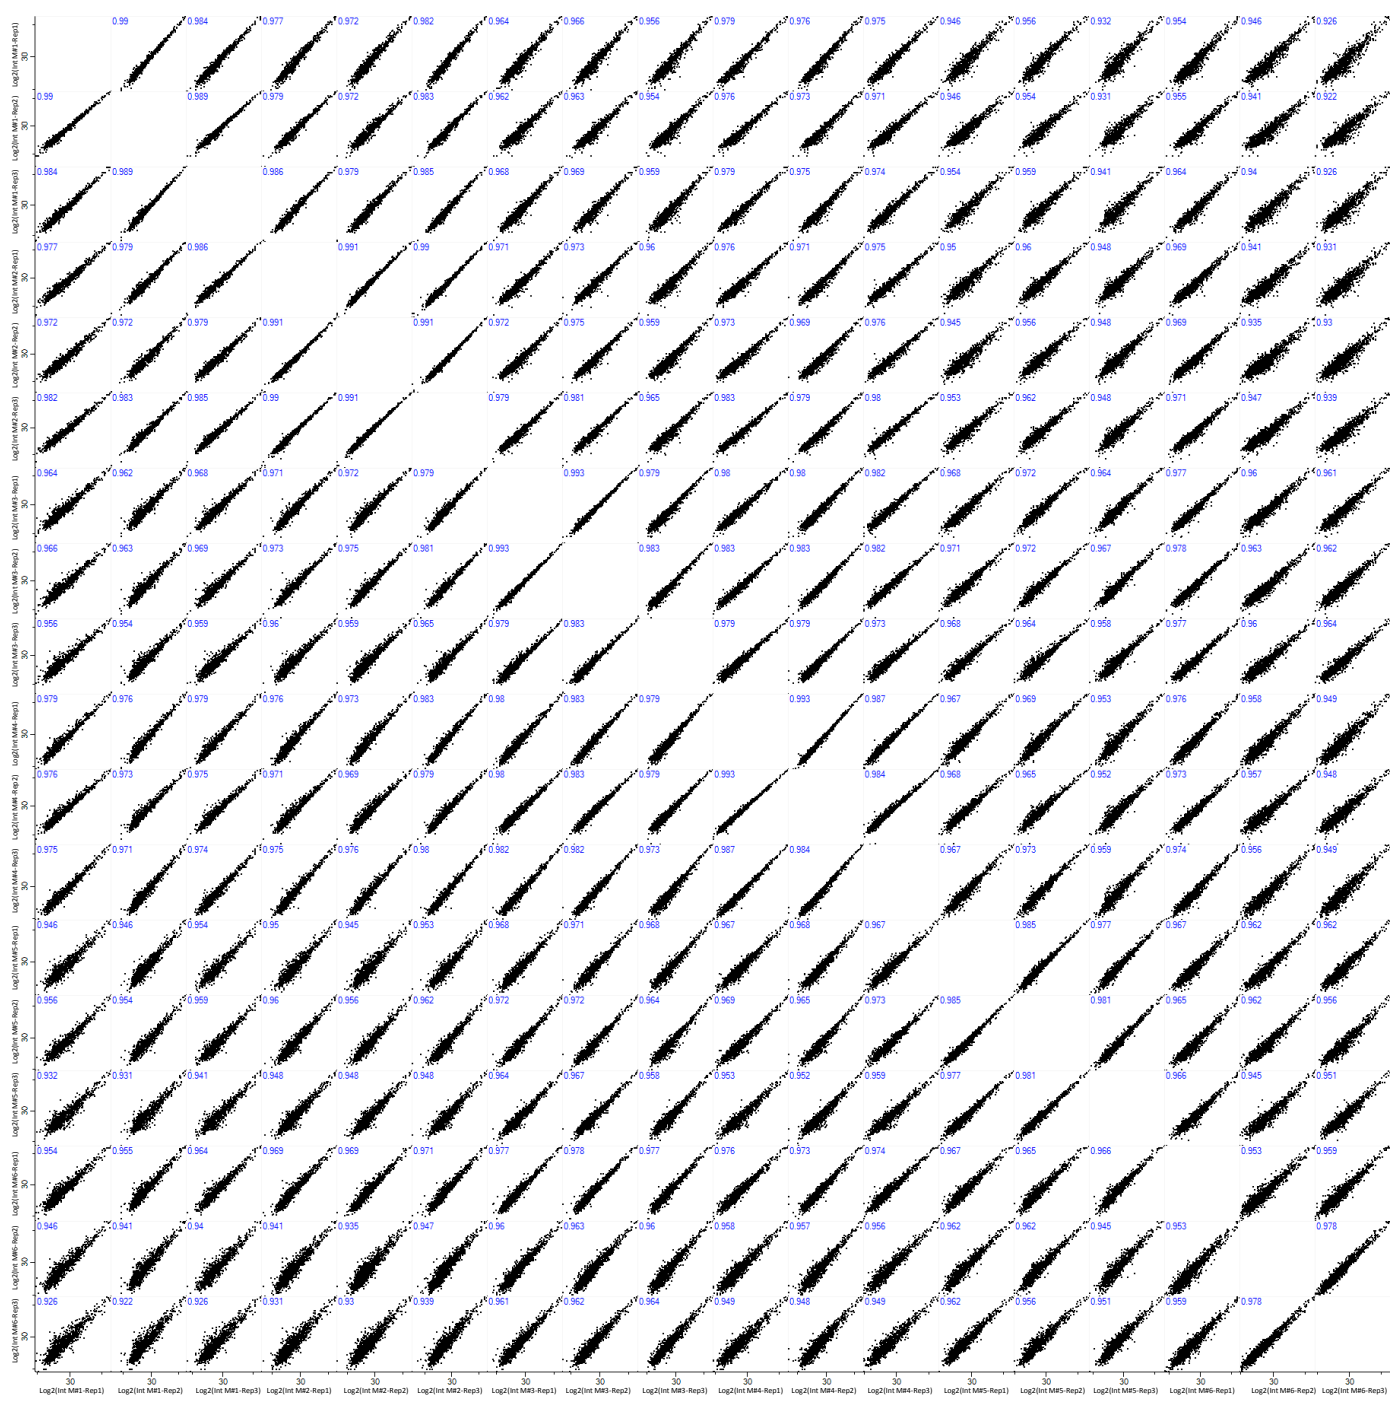

**Supplementary Figure 4.** Protein analysis. Pearson correlation coefficient analysis of the Label Free Quantification intensities (LFQ;  $\log_2$ ) which shows high correlation among methods (M#1-6) and their replicates (Rep1-3). The number in the top left corner of each plot represents the calculated Pearson correlation value.
